# Supplementary material for: Lactiplantibacillus plantarum ST-III and Lacticaseibacillus rhamnosus KF7 Enhance the Intestinal Epithelial Barrier in a Dual-Environment In Vitro Co-Culture Model
Source: MDPI journal article supplement (doi:10.3390/microorganisms12050873), 2024-04-26
Supplement: s1 [file s1]

**Supplementary Table S1.** Normalised gene expression in Caco-2 cells following 4 hours and 8 hours of co-culture with or without probiotic treatment.

| Gene symbol    | Gene name                                          | 4 hours <sup>1</sup>          |                            |                | 8 hours <sup>1</sup>          |                            |                | P-values <sup>2</sup> |       |                  |
|----------------|----------------------------------------------------|-------------------------------|----------------------------|----------------|-------------------------------|----------------------------|----------------|-----------------------|-------|------------------|
|                |                                                    | <i>L. plantarum</i><br>ST-III | <i>L. rhamnosus</i><br>KF7 | No treatment   | <i>L. plantarum</i><br>ST-III | <i>L. rhamnosus</i><br>KF7 | No treatment   | Treatment             | Time  | Treatment × Time |
| <b>ACTN1</b>   | actinin alpha 1                                    | 4660 ± 141 bc                 | 4493 ± 136 abc             | 4429 ± 134 abc | 4799 ± 146 c                  | 4389 ± 133 ab              | 4152 ± 126 a   | 0.010                 | 0.425 | 0.294            |
| <b>ACTN2</b>   | actinin alpha 2                                    | 20 ± 2 ab                     | 23 ± 3 ab                  | 19 ± 2 b       | 26 ± 3 ab                     | 26 ± 3 a                   | 27 ± 3 a       | 0.681                 | 0.006 | 0.608            |
| <b>ACTN3</b>   | actinin alpha 3                                    | 15 ± 2 a                      | 17 ± 2 a                   | 16 ± 2 a       | 16 ± 2 a                      | 16 ± 2 a                   | 15 ± 2 a       | 0.823                 | 0.844 | 0.828            |
| <b>ACTN4</b>   | actinin alpha 4                                    | 15511 ± 694 a                 | 14281 ± 639 a              | 14361 ± 643 a  | 20521 ± 918 b                 | 19339 ± 865 b              | 15012 ± 672 a  | 0.001                 | 0.000 | 0.011            |
| <b>AFDN</b>    | afadin, adherens junction formation factor         | 2815 ± 159 abc                | 2632 ± 149 ab              | 2519 ± 142 a   | 3012 ± 170 bc                 | 3219 ± 182 c               | 2546 ± 144 a   | 0.023                 | 0.047 | 0.224            |
| <b>AMOTL1</b>  | angiomin like 1                                    | 5755 ± 216 b                  | 5286 ± 198 ab              | 4763 ± 179 a   | 5448 ± 204 b                  | 5231 ± 196 ab              | 4212 ± 158 c   | 0.000                 | 0.045 | 0.316            |
| <b>ARHGEF2</b> | Rho/Rac guanine nucleotide exchange factor 2       | 1337 ± 57 ab                  | 1345 ± 57 ab               | 1229 ± 52 a    | 1833 ± 78 c                   | 1832 ± 78 c                | 1449 ± 62 b    | 0.001                 | 0.000 | 0.141            |
| <b>ASH1L</b>   | ASH1 like histone lysine methyltransferase         | 1158 ± 85 a                   | 1120 ± 82 a                | 1132 ± 83 a    | 1054 ± 77 a                   | 1208 ± 88 a                | 1030 ± 75 a    | 0.567                 | 0.517 | 0.403            |
| <b>CASK</b>    | calcium/calmodulin dependent serine protein kinase | 5398 ± 130 a                  | 5565 ± 134 a               | 5320 ± 129 a   | 5616 ± 136 a                  | 5425 ± 131 a               | 5431 ± 131 a   | 0.538                 | 0.552 | 0.379            |
| <b>CD99</b>    | CD99 molecule (Xg blood group)                     | 9298 ± 260 ac                 | 9410 ± 263 a               | 9539 ± 267 a   | 8610 ± 241 bc                 | 8650 ± 242 bc              | 8315 ± 233 b   | 0.890                 | 0.000 | 0.490            |
| <b>CDC42</b>   | cell division cycle 42                             | 19726 ± 364 a                 | 20004 ± 369 a              | 19961 ± 368 a  | 21578 ± 398 b                 | 20567 ± 379 ab             | 20718 ± 382 ab | 0.599                 | 0.002 | 0.197            |
| <b>CDK4</b>    | cyclin dependent kinase 4                          | 2486 ± 141 a                  | 2699 ± 153 ab              | 3084 ± 174 b   | 1677 ± 95 c                   | 2374 ± 134 a               | 2626 ± 149 a   | 0.000                 | 0.000 | 0.045            |
| <b>CGN</b>     | cingulin                                           | 1531 ± 126 bc                 | 1423 ± 117 ab              | 1329 ± 110 ab  | 1469 ± 121 b                  | 1870 ± 154 c               | 1149 ± 95 a    | 0.006                 | 0.665 | 0.039            |
| <b>CLDN1</b>   | claudin 1                                          | 10369 ± 408 b                 | 9586 ± 377 ab              | 9071 ± 357 ad  | 8306 ± 327 cd                 | 8050 ± 317 c               | 6603 ± 260 e   | 0.000                 | 0.000 | 0.183            |
| <b>CLDN10</b>  | claudin 10                                         | 39 ± 4 a                      | 40 ± 4 a                   | 35 ± 3 a       | 40 ± 4 a                      | 39 ± 4 a                   | 33 ± 3 a       | 0.160                 | 0.801 | 0.916            |

|                |                                          |                |               |               |                |                |               |       |       |       |
|----------------|------------------------------------------|----------------|---------------|---------------|----------------|----------------|---------------|-------|-------|-------|
| <b>CLDN11</b>  | claudin 11                               | 38 ± 3 b       | 42 ± 3 ab     | 41 ± 3 ab     | 45 ± 3 ab      | 47 ± 3 a       | 47 ± 3 a      | 0.537 | 0.010 | 0.950 |
| <b>CLDN12</b>  | claudin 12                               | 773 ± 21 ab    | 796 ± 22 a    | 765 ± 21 ab   | 746 ± 20 ab    | 769 ± 21 ab    | 731 ± 20 b    | 0.236 | 0.081 | 0.971 |
| <b>CLDN14</b>  | claudin 14                               | 30 ± 3 a       | 26 ± 2 ab     | 23 ± 2 b      | 32 ± 3 a       | 31 ± 3 a       | 27 ± 2 ab     | 0.037 | 0.098 | 0.832 |
| <b>CLDN15</b>  | claudin 15                               | 204 ± 9 a      | 202 ± 9 a     | 198 ± 9 a     | 196 ± 8 a      | 237 ± 10 b     | 186 ± 8 a     | 0.012 | 0.619 | 0.023 |
| <b>CLDN16</b>  | claudin 16                               | 347 ± 16 a     | 315 ± 15 ab   | 324 ± 15 ab   | 291 ± 13 bc    | 270 ± 12 c     | 233 ± 11 d    | 0.011 | 0.000 | 0.126 |
| <b>CLDN17</b>  | claudin 17                               | 34 ± 4 a       | 31 ± 3 a      | 28 ± 3 a      | 36 ± 4 a       | 29 ± 3 a       | 31 ± 3 a      | 0.160 | 0.720 | 0.721 |
| <b>CLDN18</b>  | claudin 18                               | 23 ± 2 ac      | 20 ± 2 a      | 18 ± 2 a      | 29 ± 3 bc      | 31 ± 3 b       | 18 ± 2 a      | 0.006 | 0.012 | 0.149 |
| <b>CLDN19</b>  | claudin 19                               | 70 ± 4 ab      | 73 ± 4 a      | 68 ± 3 ab     | 62 ± 3 b       | 70 ± 4 ab      | 63 ± 3 ab     | 0.204 | 0.082 | 0.741 |
| <b>CLDN2</b>   | claudin 2                                | 561 ± 25 b     | 606 ± 27 ab   | 766 ± 34 d    | 420 ± 19 e     | 487 ± 22 c     | 643 ± 28 a    | 0.000 | 0.000 | 0.426 |
| <b>CLDN20</b>  | claudin 20                               | 24 ± 2 bd      | 28 ± 2 ab     | 23 ± 2 d      | 34 ± 2 c       | 33 ± 2 ac      | 25 ± 2 bd     | 0.004 | 0.001 | 0.140 |
| <b>CLDN3</b>   | claudin 3                                | 1959 ± 66 a    | 1836 ± 62 a   | 1622 ± 55 c   | 2918 ± 99 d    | 2425 ± 82 b    | 1933 ± 65 a   | 0.000 | 0.000 | 0.009 |
| <b>CLDN4</b>   | claudin 4                                | 25290 ± 1152 b | 21882 ± 997 a | 17639 ± 804 c | 32873 ± 1497 d | 28596 ± 1303 b | 21022 ± 958 a | 0.000 | 0.000 | 0.519 |
| <b>CLDN5</b>   | claudin 5                                | 23 ± 2 c       | 17 ± 1 ab     | 14 ± 1 b      | 17 ± 1 ab      | 21 ± 2 ac      | 16 ± 1 b      | 0.012 | 0.735 | 0.017 |
| <b>CLDN6</b>   | claudin 6                                | 130 ± 19 a     | 111 ± 17 a    | 122 ± 18 a    | 115 ± 17 a     | 95 ± 14 a      | 87 ± 13 a     | 0.401 | 0.104 | 0.719 |
| <b>CLDN7</b>   | claudin 7                                | 7518 ± 175 a   | 7498 ± 174 a  | 7994 ± 186 ac | 7548 ± 176 a   | 8578 ± 200 b   | 8126 ± 189 bc | 0.011 | 0.010 | 0.015 |
| <b>CLDN8</b>   | claudin 8                                | 15 ± 2 a       | 14 ± 2 a      | 14 ± 2 a      | 14 ± 2 a       | 17 ± 2 a       | 15 ± 2 a      | 0.859 | 0.618 | 0.630 |
| <b>CLDN9</b>   | claudin 9                                | 38 ± 3 ab      | 39 ± 3 ab     | 39 ± 3 ab     | 43 ± 3 a       | 40 ± 3 a       | 33 ± 2 b      | 0.199 | 0.863 | 0.077 |
| <b>CRB1</b>    | CNKSR family member 3                    | 37 ± 3 bc      | 34 ± 3 ab     | 28 ± 3 a      | 41 ± 4 bc      | 48 ± 4 c       | 40 ± 4 bc     | 0.092 | 0.001 | 0.272 |
| <b>CRB3</b>    | crumbs cell polarity complex component 1 | 3139 ± 92 a    | 3175 ± 93 a   | 3043 ± 89 a   | 3804 ± 111 c   | 3462 ± 101 b   | 3138 ± 92 a   | 0.002 | 0.000 | 0.028 |
| <b>CSNK2A1</b> | crumbs cell polarity complex component 3 | 83 ± 6 a       | 92 ± 7 a      | 91 ± 7 a      | 132 ± 10 b     | 126 ± 9 b      | 118 ± 9 b     | 0.853 | 0.000 | 0.351 |

|                |                                             |               |               |               |               |               |               |       |       |       |
|----------------|---------------------------------------------|---------------|---------------|---------------|---------------|---------------|---------------|-------|-------|-------|
| <b>CSNK2A2</b> | casein kinase 2 alpha 2                     | 125 ± 13 a    | 120 ± 13 ab   | 103 ± 11 ab   | 90 ± 9 b      | 135 ± 14 a    | 91 ± 10 b     | 0.038 | 0.191 | 0.097 |
| <b>CSNK2B</b>  | casein kinase 2 alpha 2                     | 9498 ± 173 bc | 9303 ± 170 ab | 8885 ± 162 a  | 9846 ± 180 c  | 9859 ± 180 c  | 9080 ± 166 ab | 0.000 | 0.013 | 0.600 |
| <b>CTNNA1</b>  | casein kinase 2 beta                        | 15336 ± 479 a | 14879 ± 465 a | 14295 ± 447 a | 16793 ± 525 b | 17121 ± 535 b | 14736 ± 460 a | 0.004 | 0.002 | 0.214 |
| <b>CTNNA2</b>  | catenin alpha 1                             | 25 ± 4 ac     | 19 ± 3 ab     | 12 ± 2 b      | 32 ± 6 c      | 21 ± 4 ac     | 22 ± 4 ac     | 0.007 | 0.021 | 0.358 |
| <b>CTNNA3</b>  | catenin alpha 2                             | 23 ± 3 b      | 17 ± 3 ab     | 14 ± 2 a      | 22 ± 3 b      | 20 ± 3 ab     | 18 ± 3 ab     | 0.051 | 0.316 | 0.664 |
| <b>CTNNB1</b>  | catenin alpha 3                             | 5374 ± 159 a  | 5176 ± 153 a  | 4951 ± 146 a  | 6124 ± 181 b  | 6063 ± 179 b  | 5198 ± 153 a  | 0.001 | 0.000 | 0.162 |
| <b>CTTN</b>    | catenin beta 1                              | 9905 ± 440 ab | 9470 ± 421 ab | 10379 ± 461 a | 9112 ± 405 b  | 10711 ± 476 a | 10394 ± 462 a | 0.130 | 0.704 | 0.072 |
| <b>EPB41</b>   | cortactin                                   | 436 ± 15 ab   | 406 ± 14 a    | 434 ± 15 ab   | 443 ± 15 ab   | 461 ± 16 b    | 416 ± 14 a    | 0.619 | 0.240 | 0.049 |
| <b>ESAM</b>    | erythrocyte membrane protein band 4.1       | 335 ± 15 a    | 356 ± 16 a    | 338 ± 15 a    | 470 ± 21 c    | 446 ± 20 bc   | 410 ± 18 b    | 0.231 | 0.000 | 0.224 |
| <b>EZR</b>     | endothelial cell adhesion molecule          | 13905 ± 455 a | 12890 ± 421 a | 11464 ± 375 c | 20249 ± 662 d | 16831 ± 550 b | 12740 ± 416 a | 0.000 | 0.000 | 0.001 |
| <b>F11R</b>    | ezrin                                       | 7640 ± 228 b  | 7315 ± 218 ab | 6875 ± 205 a  | 9023 ± 269 c  | 9026 ± 269 c  | 7506 ± 224 b  | 0.000 | 0.000 | 0.124 |
| <b>GNAI1</b>   | F11 receptor                                | 66 ± 4 ab     | 67 ± 4 ab     | 57 ± 3 a      | 68 ± 4 b      | 60 ± 4 ab     | 42 ± 2 c      | 0.000 | 0.007 | 0.021 |
| <b>HCLS1</b>   | G protein subunit alpha i1                  | 27 ± 3 a      | 33 ± 4 a      | 28 ± 3 a      | 35 ± 4 a      | 26 ± 3 a      | 27 ± 3 a      | 0.592 | 0.935 | 0.143 |
| <b>ICAM1</b>   | hematopoietic cell-specific Lyn substrate 1 | 2419 ± 90 a   | 2375 ± 88 a   | 1742 ± 65 c   | 3001 ± 111 b  | 3021 ± 112 b  | 1891 ± 70 c   | 0.000 | 0.000 | 0.081 |
| <b>ICAM2</b>   | intercellular adhesion molecule 1           | 102 ± 6 a     | 102 ± 6 a     | 93 ± 5 a      | 142 ± 8 b     | 143 ± 8 b     | 132 ± 7 b     | 0.214 | 0.000 | 0.983 |
| <b>IGSF5</b>   | intercellular adhesion molecule 2           | 42 ± 3 d      | 52 ± 4 abc    | 44 ± 3 bd     | 62 ± 4 ac     | 62 ± 4 a      | 51 ± 4 bcd    | 0.043 | 0.000 | 0.205 |
| <b>ILK</b>     | immunoglobulin superfamily member 5         | 3556 ± 58 a   | 3590 ± 58 a   | 3396 ± 55 c   | 3880 ± 63 b   | 3812 ± 62 b   | 3534 ± 57 ac  | 0.000 | 0.000 | 0.337 |
| <b>JAM2</b>    | integrin linked kinase                      | 12 ± 1 a      | 11 ± 1 a      | 10 ± 1 a      | 12 ± 1 a      | 11 ± 1 a      | 11 ± 1 a      | 0.254 | 0.543 | 0.934 |
| <b>JAM3</b>    | junctional adhesion molecule 2              | 32 ± 3 a      | 36 ± 4 a      | 28 ± 3 a      | 37 ± 4 a      | 37 ± 4 a      | 30 ± 3 a      | 0.079 | 0.314 | 0.851 |
| <b>LLGL1</b>   | junctional adhesion molecule 3              | 623 ± 15 a    | 626 ± 15 a    | 636 ± 15 a    | 552 ± 13 b    | 641 ± 15 a    | 650 ± 15 a    | 0.001 | 0.174 | 0.005 |

|                 |                                                                      |               |               |               |                |               |               |       |       |       |
|-----------------|----------------------------------------------------------------------|---------------|---------------|---------------|----------------|---------------|---------------|-------|-------|-------|
| <b>LLGL2</b>    | LLGL scribble cell polarity complex component 1                      | 1606 ± 98 a   | 1595 ± 98 a   | 1494 ± 92 a   | 1507 ± 92 a    | 1935 ± 119 b  | 1466 ± 90 a   | 0.023 | 0.457 | 0.090 |
| <b>MAGI1</b>    | LLGL scribble cell polarity complex component 2                      | 423 ± 30 ab   | 405 ± 29 ab   | 394 ± 28 ab   | 413 ± 30 ab    | 443 ± 32 a    | 346 ± 25 b    | 0.113 | 0.707 | 0.316 |
| <b>MAGI2</b>    | ligand of numb-protein X 1                                           | 25 ± 2 ab     | 24 ± 2 ab     | 19 ± 2 b      | 31 ± 3 a       | 27 ± 3 a      | 26 ± 2 a      | 0.077 | 0.006 | 0.587 |
| <b>MARK2</b>    | membrane associated guanylate kinase, WW and PDZ domain containing 2 | 3146 ± 98 bc  | 3063 ± 95 ab  | 2817 ± 88 a   | 3562 ± 111 d   | 3349 ± 104 cd | 3011 ± 94 ab  | 0.000 | 0.001 | 0.638 |
| <b>MARVELD2</b> | microtubule affinity regulating kinase 2                             | 2297 ± 106 b  | 2185 ± 101 ab | 1805 ± 83 c   | 1933 ± 89 ac   | 1928 ± 89 ac  | 1527 ± 70 d   | 0.000 | 0.000 | 0.845 |
| <b>MPDZ</b>     | MARVEL domain containing 2                                           | 27 ± 3 a      | 33 ± 3 a      | 29 ± 3 a      | 33 ± 3 a       | 32 ± 3 a      | 32 ± 3 a      | 0.613 | 0.235 | 0.472 |
| <b>MPP5</b>     | occludin                                                             | 2881 ± 86 ab  | 2815 ± 84 ab  | 2584 ± 78 c   | 2936 ± 88 b    | 2673 ± 80 ac  | 2269 ± 68 d   | 0.000 | 0.031 | 0.056 |
| <b>MPP6</b>     | protein associated with LIN7 1, MAGUK p55 family member              | 890 ± 25 b    | 1009 ± 28 a   | 1160 ± 32 c   | 882 ± 24 b     | 952 ± 26 ab   | 1220 ± 34 c   | 0.000 | 0.807 | 0.152 |
| <b>OCLN</b>     | protein associated with LIN7 2, MAGUK p55 family member              | 2382 ± 76 d   | 2164 ± 69 a   | 1814 ± 58 b   | 2215 ± 71 ad   | 2111 ± 67 a   | 1538 ± 49 c   | 0.000 | 0.002 | 0.094 |
| <b>PARD3</b>    | par-3 family cell polarity regulator                                 | 3638 ± 104 a  | 3599 ± 103 a  | 3178 ± 91 c   | 4345 ± 125 b   | 4141 ± 119 b  | 3404 ± 98 ac  | 0.000 | 0.000 | 0.162 |
| <b>PARD6A</b>   | par-6 family cell polarity regulator alpha                           | 98 ± 6 a      | 104 ± 6 a     | 103 ± 6 a     | 99 ± 6 a       | 102 ± 6 a     | 103 ± 6 a     | 0.663 | 1.000 | 0.987 |
| <b>PARD6B</b>   | par-6 family cell polarity regulator beta                            | 1017 ± 57 ac  | 905 ± 51 ab   | 826 ± 46 b    | 1136 ± 64 c    | 1020 ± 57 ac  | 659 ± 37 d    | 0.000 | 0.969 | 0.005 |
| <b>PECAM1</b>   | platelet and endothelial cell adhesion molecule 1                    | 58 ± 4 a      | 53 ± 4 a      | 56 ± 4 a      | 53 ± 4 a       | 51 ± 4 ab     | 42 ± 3 b      | 0.250 | 0.024 | 0.268 |
| <b>PRKCI</b>    | protein kinase C iota                                                | 2036 ± 47 bc  | 1957 ± 45 ab  | 1798 ± 42 d   | 2331 ± 54 e    | 2091 ± 48 c   | 1833 ± 42 ad  | 0.000 | 0.000 | 0.050 |
| <b>PRKCZ</b>    | protein kinase C zeta                                                | 1365 ± 46 ab  | 1351 ± 45 ab  | 1325 ± 44 ac  | 1459 ± 49 b    | 1449 ± 49 ab  | 1228 ± 41 c   | 0.007 | 0.459 | 0.055 |
| <b>PTEN</b>     | phosphatase and tensin homolog                                       | 3843 ± 132 b  | 3785 ± 130 ab | 3304 ± 114 c  | 4007 ± 138 b   | 3479 ± 120 ac | 2993 ± 103 d  | 0.000 | 0.095 | 0.089 |
| <b>RAC1</b>     | radixin                                                              | 7428 ± 187 a  | 7260 ± 183 a  | 6484 ± 163 c  | 8586 ± 216 b   | 8899 ± 224 b  | 7545 ± 190 a  | 0.000 | 0.000 | 0.436 |
| <b>RDX</b>      | ras homolog family member A                                          | 12288 ± 523 a | 12308 ± 524 a | 12456 ± 530 a | 11355 ± 484 ab | 10345 ± 441 b | 10283 ± 438 b | 0.481 | 0.000 | 0.363 |

|               |                                                                         |                |               |               |               |               |               |       |       |       |
|---------------|-------------------------------------------------------------------------|----------------|---------------|---------------|---------------|---------------|---------------|-------|-------|-------|
| <b>RHOA</b>   | ribonuclease A family member 1,<br>pancreatic                           | 3947 ± 106 a   | 3939 ± 105 a  | 3980 ± 106 a  | 3823 ± 102 a  | 3888 ± 104 a  | 3722 ± 100 a  | 0.817 | 0.089 | 0.584 |
| <b>ROCK1</b>  | Rho associated coiled-coil containing<br>protein kinase 1               | 1641 ± 69 ac   | 1572 ± 66 ab  | 1477 ± 62 ab  | 1810 ± 76 c   | 1625 ± 68 ac  | 1398 ± 59 b   | 0.001 | 0.449 | 0.191 |
| <b>SMURF1</b> | SMAD specific E3 ubiquitin protein<br>ligase 1                          | 570 ± 22 a     | 547 ± 21 a    | 491 ± 19 c    | 788 ± 30 d    | 702 ± 27 b    | 559 ± 21 a    | 0.000 | 0.000 | 0.047 |
| <b>SPTA1</b>  | spectrin alpha, erythrocytic 1                                          | 10 ± 2 a       | 12 ± 2 a      | 10 ± 2 a      | 12 ± 2 a      | 14 ± 2 a      | 11 ± 2 a      | 0.472 | 0.239 | 0.891 |
| <b>SPTAN1</b> | spectrin alpha, non-erythrocytic 1                                      | 4063 ± 219 ab  | 3720 ± 201 a  | 3843 ± 208 ab | 4305 ± 233 ab | 4402 ± 238 b  | 3794 ± 205 ab | 0.234 | 0.108 | 0.240 |
| <b>SPTB</b>   | spectrin beta, erythrocytic                                             | 42 ± 2 b       | 36 ± 2 a      | 29 ± 2 c      | 38 ± 2 ab     | 41 ± 2 ab     | 37 ± 2 ab     | 0.003 | 0.043 | 0.006 |
| <b>SYMPK</b>  | symplesin scaffold protein                                              | 2933 ± 157 a   | 2838 ± 152 a  | 2742 ± 147 a  | 2738 ± 147 a  | 2880 ± 155 a  | 2598 ± 139 a  | 0.374 | 0.401 | 0.700 |
| <b>TIAM1</b>  | TIAM Rac1 associated GEF 1                                              | 68 ± 5 b       | 59 ± 5 ab     | 52 ± 4 ac     | 46 ± 4 c      | 48 ± 4 ac     | 42 ± 3 c      | 0.071 | 0.000 | 0.345 |
| <b>TJAP1</b>  | tight junction associated protein 1                                     | 397 ± 15 ac    | 430 ± 16 a    | 377 ± 14 c    | 503 ± 19 b    | 503 ± 19 b    | 401 ± 15 ac   | 0.000 | 0.000 | 0.071 |
| <b>TJP1</b>   | tight junction protein 1                                                | 2850 ± 134 a   | 2680 ± 126 a  | 2549 ± 120 a  | 3972 ± 187 c  | 3406 ± 161 b  | 2599 ± 123 a  | 0.000 | 0.000 | 0.006 |
| <b>TJP2</b>   | tight junction protein 2                                                | 3359 ± 224 a   | 3174 ± 212 a  | 2913 ± 194 a  | 4337 ± 289 b  | 4393 ± 293 b  | 2953 ± 197 a  | 0.001 | 0.001 | 0.058 |
| <b>TJP3</b>   | tight junction protein 3                                                | 2761 ± 98 a    | 2790 ± 99 a   | 2767 ± 99 a   | 3552 ± 127 b  | 3602 ± 128 b  | 2836 ± 101 a  | 0.002 | 0.000 | 0.003 |
| <b>VAPA</b>   | VAMP associated protein A                                               | 10631 ± 177 ab | 10277 ± 171 a | 9453 ± 158 c  | 12029 ± 201 d | 10867 ± 181 b | 9285 ± 155 c  | 0.000 | 0.000 | 0.001 |
| <b>WAS</b>    | WASP actin nucleation promoting<br>factor                               | 39 ± 3 b       | 34 ± 3 ab     | 32 ± 3 ab     | 34 ± 3 ab     | 30 ± 2 ac     | 25 ± 2 c      | 0.012 | 0.008 | 0.540 |
| <b>WASL</b>   | WASP like actin nucleation promoting<br>factor                          | 5759 ± 222 ac  | 5490 ± 212 a  | 4769 ± 184 b  | 6147 ± 237 c  | 5343 ± 206 a  | 4288 ± 165 b  | 0.000 | 0.463 | 0.093 |
| <b>WHAMM</b>  | WASP homolog associated with actin,<br>golgi membranes and microtubules | 839 ± 33 b     | 808 ± 32 ab   | 735 ± 29 a    | 1157 ± 45 d   | 989 ± 39 c    | 789 ± 31 ab   | 0.000 | 0.000 | 0.011 |
| <b>YBX3</b>   | Y-box binding protein 3                                                 | 2826 ± 82 a    | 2919 ± 85 a   | 2798 ± 81 a   | 3613 ± 105 b  | 3521 ± 102 b  | 3238 ± 94 c   | 0.060 | 0.000 | 0.225 |

<sup>1</sup> Mean ( $\pm$  SEM) normalised gene expression for each treatment-timepoint combination is presented (n=6 per treatment per timepoint). Treatments which do not share the same letter (a, b, c, d) are significantly different ( $P < 0.05$ ).

<sup>2</sup> Model used for the permutation ANOVAs was  $\text{gene} \sim \text{experiment} + \text{treatment} + \text{timepoint} + \text{treatment} \times \text{timepoint}$
